# Supplementary material for: The E3 ubiquitin ligase mind bomb 1 ubiquitinates and promotes the degradation of survival of motor neuron protein
Source: PubMed Central journal article supplement — Mol Biol Cell. 2013 Jun 15;24(12):1863–71. doi: 10.1091/mbc.E13-01-0042 (PMC3681692; doi:10.1091/mbc.e13-01-0042), 2013-06-15

Supp. Fig. 1: Denaturing SMN dissociates binding partners before immunoprecipitation  
(A) NSC-34 cell lysates were denatured with 1% SDS and then renatured with 4.5% Triton X-100 before immunoprecipitation with anti-SMN antibody. Western blots were probed with antibodies to gemin 5, gemin 3, gemin 2, and SMN.

Supp. Fig. 2: Parkin-myc does not ubiquitinate SMN. NSC-34 cells were transiently transfected with HA-Ub and either empty vector (pCMV-myc), Mib1-myc, or parkin-myc for 48 hours. Cells were harvested for immunoprecipitation using an SMN antibody and run on a Western blot together with the input (10%). Membranes were probed for HA-Ub expression.

Supp. Fig. 3: *mib-1* knockdown does not significantly increase pharyngeal pumping in *smn-1* null (*Cesmn-1*) animals. Decreasing expression of the *C. elegans* ortholog of Mib1 by RNAi increased pharyngeal pumping, but this did not reach statistical significance.

Standard SMN IPDenatured/Renatured SMN IP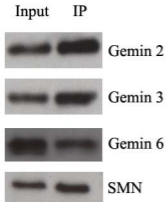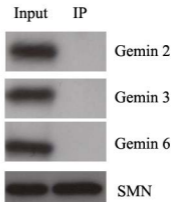

IP: SMN

pCMV-myc

Mib1-myc

Parkin-myc

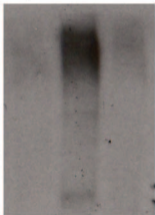

Ub-HA

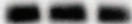

SMN

Input:

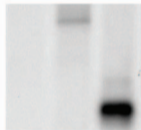

Mib1-myc

Parkin-myc

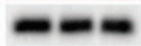

SMN

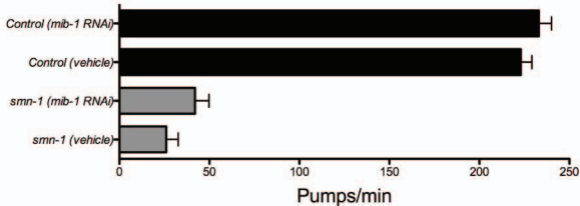

Supplement: supp_E13-01-0042v1_CombinedSupMats.pdf [file supp_E13-01-0042v1_CombinedSupMats.pdf]
